# Supplementary material for: Extrinsically Integrated Instructional Quizzes in Learning Games: An Educational Disaster or Not?
Source: Front Psychol. 2021 Aug 19;12:678380. doi: 10.3389/fpsyg.2021.678380 (PMC8417244; doi:10.3389/fpsyg.2021.678380)
Supplement: Supplementary file 2 [file Table_2.XLSX]

## Sheet: List1
		Supplement B - Quiz questions
set	id	Questions	Correct	Incorrect 1	Incorrect 2	Incorrect 3	Topic
A	1	What causes the hiccups?	A diaphragm spasm	A vocal cord spasm	Temporary limitation of lung function	Muscle cramp in the neck	Human Body
A	2	What is produced in bone marrow?	Red blood cells	White blood cells	Blood platelets	Bone platelets	Human Body
A	3	What is a nephron?	Basic building block and functional unit of the kidneys	Basic building block and functional unit of the liver	Basic building block and functional unit of the brain	Basic building block and functional unit of the lungs	Human Body
A	4	What is the Czech word for oregano?	Dobromysl	Majoránka	Kostival	Šalvěj	Nature
A	5	Why do snakes stick out their tongues?	To detect scents in the air	To hunt for food	To grind up food	To lower body temperature	Nature
A	6	What is smooth muscle tissue?	Type of muscle tissue we cannot control voluntarily	Type of muscle tissue we can control voluntarily	Type of muscle tissue the heart is made of	Type of muscle tissue the biceps are made of	Nature
A	7	What is a wolverine?	Mammal	Bird	Omnivore	Fish	Nature
A	8	What chemicals turn into sugar with the help of energy from the sun during photosynthesis?	Water and carbon dioxide	Water and nitrogen	Oxygen and carbon dioxide	Water and oxygen	Nature
A	9	What animals are also called cougars?	North American puma	North American jaguar	Red lynx	African civet	Nature
A	10	What is the name for the softest mineral?	Talc	Rock salt	Calcite	Fluorite	Earth Geology
A	11	How does moraine form?	Glacial activity	Wind activity	Sea activity	Fresh water activity	Earth Geology
A	12	How was coal created?	Decay of large plants that collapsed into swamps	Volcanic activity from the Triassic era	Folding under the earth's surface	High pressure under the earth's surface	Earth Geology
B	13	What part of the body grows your entire life?	Ears	Feet	Fingers	Tongue	Human Body
B	14	Where can you find the meniscus?	In the knee joint	In the skull	In the neck vertebrae	In the mouth	Human Body
B	15	How many weeks does a normal human pregnancy last?	40 weeks	30 weeks	34 weeks	50 weeks	Human Body
B	16	What is the main component of hair?	Keratin	Pyrrolysine	Collagen	Hemoglobin	Human Body
B	17	Where can you find the vestibular system in a human?	Inner ear	Brain	Backbone	Eye	Human Body
B	18	What is the name of the sleep phase characterized by vivid dreams and eye movements?	REM phase	SLEEP phase	NREM phase	CAM phase	Human Body
B	19	What are the names of the moons of Mars?	Phobos and Deimos	Io and Europa	Ananke and Thyone	Arche and Kale	Space
B	20	What, in the universe, do we call a red dwarf?	A small and relatively cold star	A planet in the solar system	A constellation	A star cluster	Space
B	21	What is a comet's tail actually made of?	Gas and dust lit up by reflected sunlight	Fire burning from a flying object	Fire caused by entry into the atmosphere	An illusion caused by a fast-flying comet	Space
B	22	What is permafrost?	Permanently frozen ground	Transitional phase between snow and ice	Ice cave	Rivers with very cold water	Earth Geology
B	23	What do we call the most fertile type of soil?	Black earth	Brown earth	Gray earth	Podzol	Earth Geology
B	24	What is the difference between magma and lava?	Magma is inside a volcano, lava is on the surface	Lava is inside a volcano, magma is on the surface	No difference	Lava is melted rock and magma is not	Earth Geology
